# Supplementary material for: Antibiotic perturbation of the murine gut microbiome enhances the adiposity, insulin resistance, and liver disease associated with high-fat diet
Source: PubMed Central journal article supplement (PMC4847194; doi:10.1186/s13073-016-0297-9), 2016-04-27
Supplement: 13073_2016_297_MOESM2_ESM.pdf [file 13073_2016_297_MOESM2_ESM.pdf]

**C**

Quality scores across all bases (Sanger / Illumina 1.9 encoding)

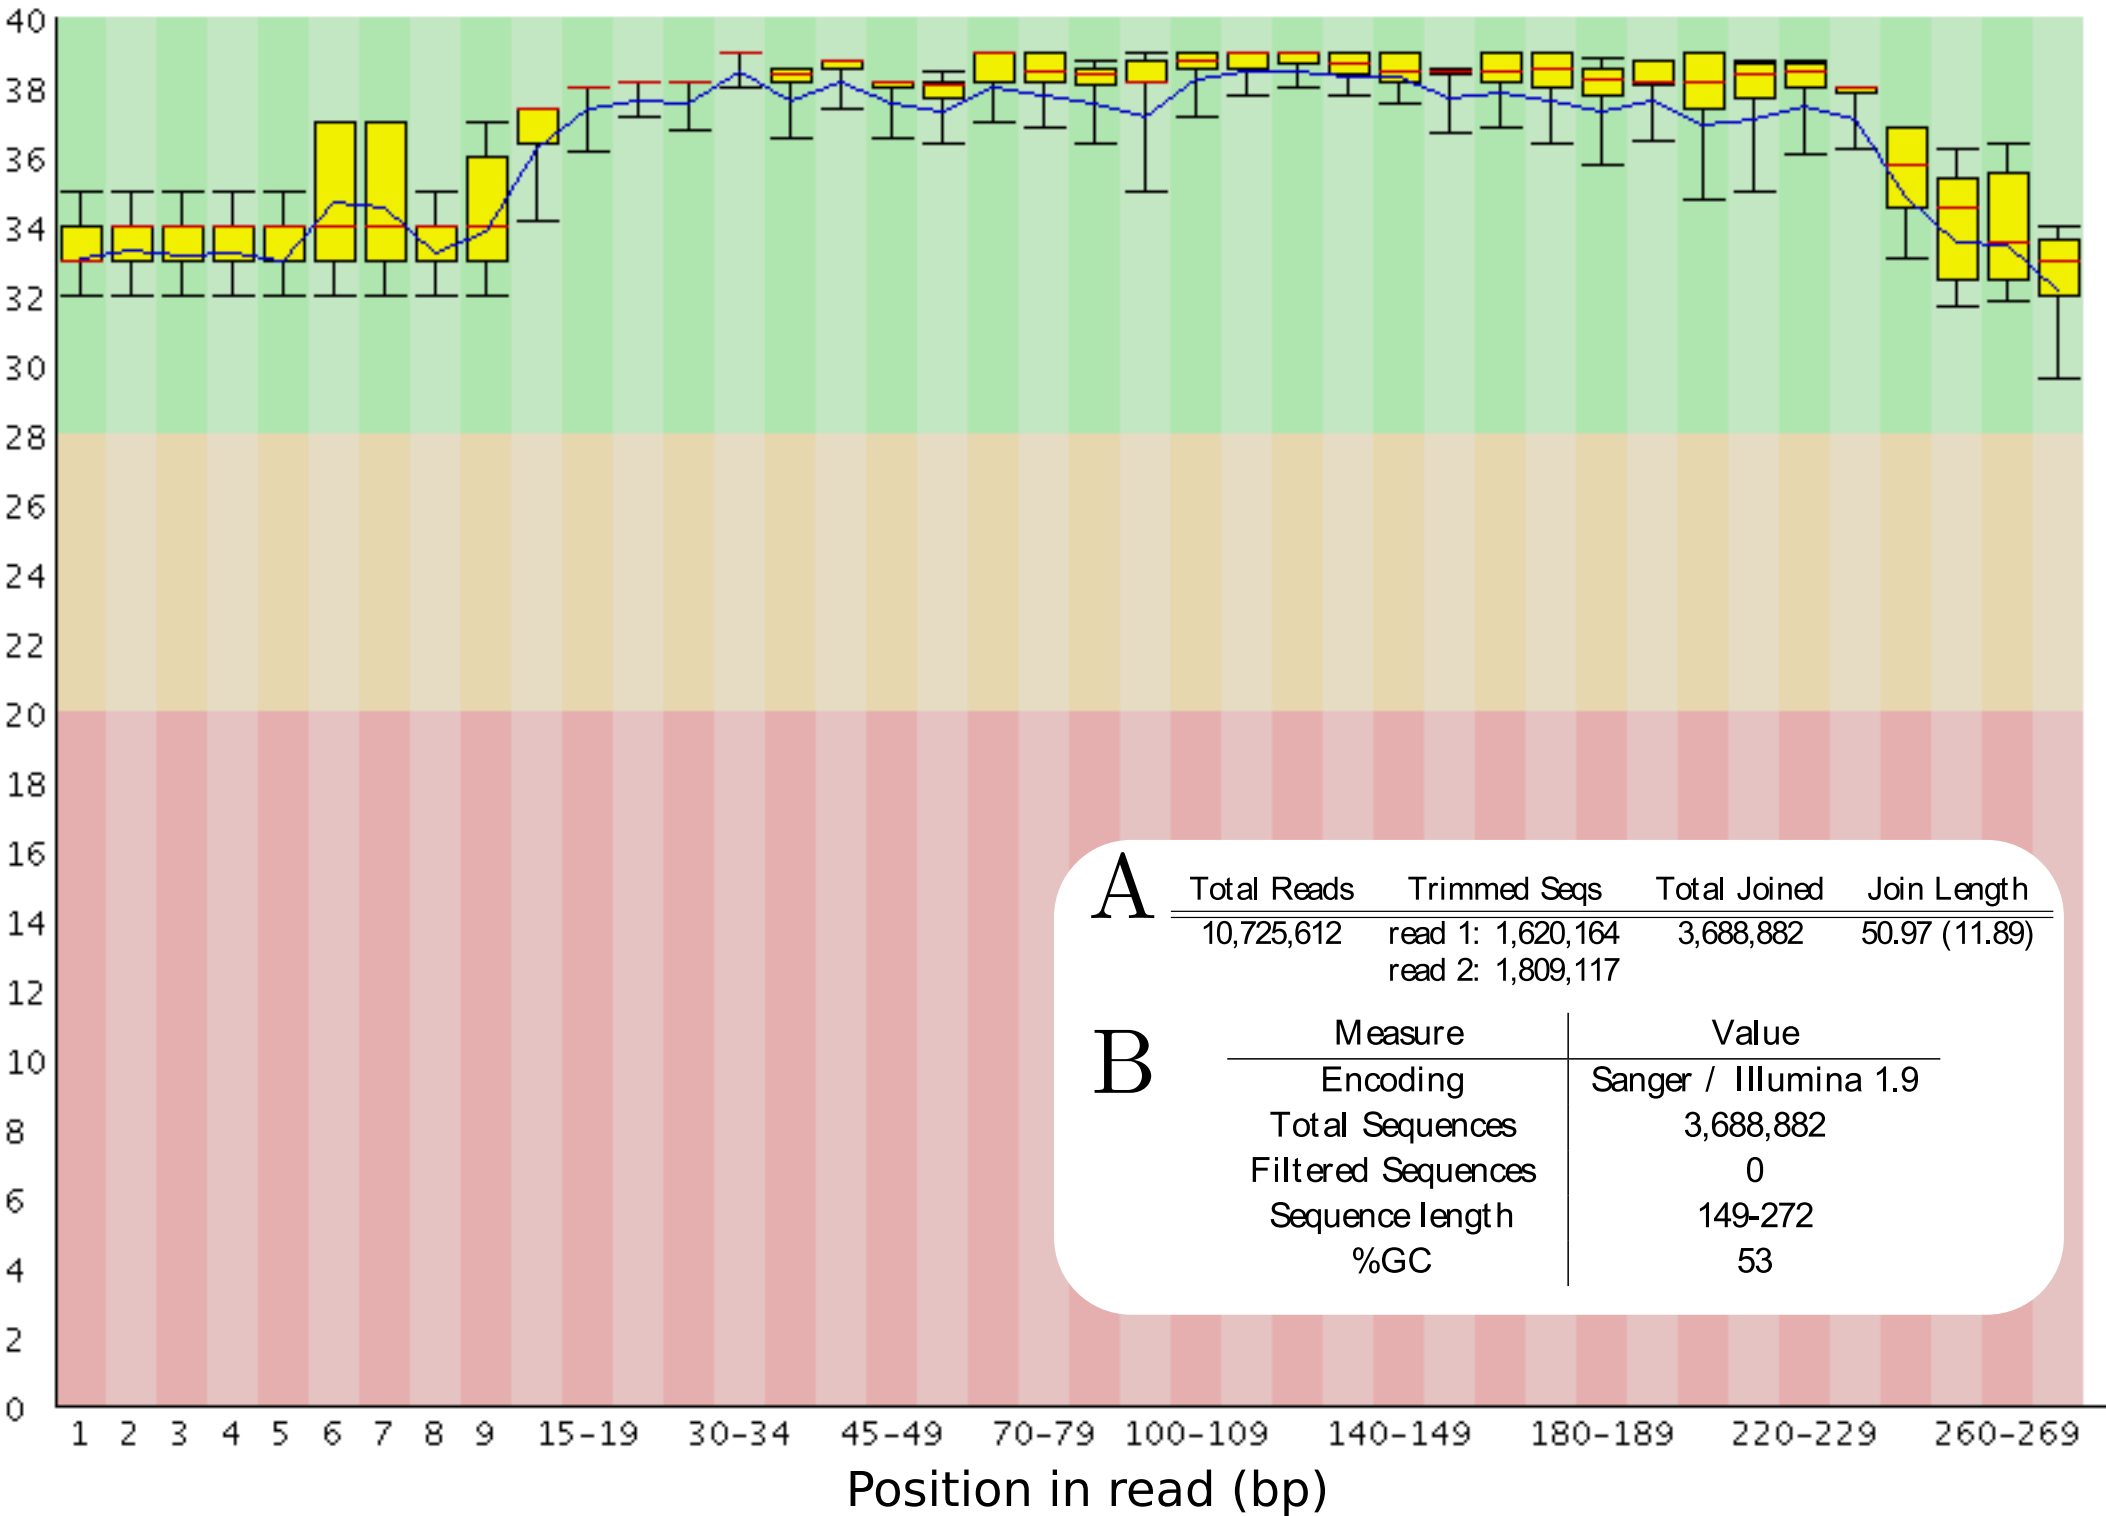**A**

| Total Reads | Trimmed Seqs                           | Total Joined | Join Length   |
|-------------|----------------------------------------|--------------|---------------|
| 10,725,612  | read 1: 1,620,164<br>read 2: 1,809,117 | 3,688,882    | 50.97 (11.89) |

**B**

| Measure            | Value                 |
|--------------------|-----------------------|
| Encoding           | Sanger / Illumina 1.9 |
| Total Sequences    | 3,688,882             |
| Filtered Sequences | 0                     |
| Sequence length    | 149-272               |
| %GC                | 53                    |
