# Supplementary material for: Antibiotic perturbation of the murine gut microbiome enhances the adiposity, insulin resistance, and liver disease associated with high-fat diet
Source: PubMed Central journal article supplement (PMC4847194; doi:10.1186/s13073-016-0297-9), 2016-04-27
Supplement: 13073_2016_297_MOESM8_ESM.pdf [file 13073_2016_297_MOESM8_ESM.pdf]

# Significant Taxa-host associations as determined from sPLS regression

| TaxID | Rank2    | Taxa            | NAFLD                    | BMC            | DMI            | Fat            | Lean           | Weight         | Weight+1       |                |
|-------|----------|-----------------|--------------------------|----------------|----------------|----------------|----------------|----------------|----------------|----------------|
| 1     | 592160   | p_Firmicutes    | g_Lactobacillus          | -              | -              | <5.000e-04 (-) | <5.000e-04 (-) | -              | <5.000e-04 (-) | 1.001e-03 (-)  |
| 2     | 1107027  | p_Firmicutes    | g_Lactobacillus          | -              | <5.000e-04 (-) | 2.001e-03 (-)  | -              | <5.000e-04 (-) | 7.004e-03 (-)  | -              |
| 3     | OTU1     | p_Firmicutes    | g_Lactobacillus          | -              | <5.000e-04 (-) | 4.002e-03 (-)  | -              | <5.000e-04 (-) | 3.002e-03 (-)  | -              |
| 4     | 716006   | p_Firmicutes    | g_Lactococcus            | -              | <5.000e-04 (+) | <5.000e-04 (+) | <5.000e-04 (+) | <5.000e-04 (+) | <5.000e-04 (+) | <5.000e-04 (+) |
| 5     | 324882   | p_Firmicutes    | g_Turicibacter           | -              | -              | 6.003e-03 (-)  | 7.004e-03 (-)  | -              | -              | 8.004e-03 (-)  |
| 6     | OTU45    | p_Firmicutes    | g_Turicibacter           | -              | -              | <5.000e-04 (-) | 2.001e-03 (-)  | -              | -              | -              |
| 7     | 835900   | p_Bacteroidetes | g_Odoribacter            | -              | -              | -              | -              | -              | -              | -              |
| 8     | 206817   | p_Bacteroidetes | f_S24-7                  | -              | -              | -              | -              | -              | -              | 1.001e-03 (+)  |
| 9     | 270984   | p_Bacteroidetes | f_S24-7                  | -              | -              | 5.003e-03 (-)  | <5.000e-04 (-) | -              | -              | <5.000e-04 (-) |
| 10    | 453896   | p_Bacteroidetes | f_S24-7                  | -              | -              | -              | 2.001e-03 (-)  | -              | -              | 9.005e-03 (-)  |
| 11    | 184517   | p_Bacteroidetes | f_S24-7                  | -              | 1.001e-03 (+)  | -              | -              | 1.001e-03 (+)  | -              | -              |
| 12    | OTU4131  | p_Bacteroidetes | f_S24-7                  | -              | 1.001e-03 (+)  | -              | -              | 3.002e-03 (+)  | -              | -              |
| 13    | 332666   | p_Bacteroidetes | f_S24-7                  | -              | 2.001e-03 (+)  | -              | -              | -              | -              | -              |
| 14    | 353073   | p_Bacteroidetes | f_S24-7                  | -              | <5.000e-04 (-) | <5.000e-04 (-) | 1.001e-03 (-)  | <5.000e-04 (-) | <5.000e-04 (-) | <5.000e-04 (-) |
| 15    | 421792   | p_Bacteroidetes | f_S24-7                  | -              | <5.000e-04 (+) | 9.005e-03 (+)  | 6.003e-03 (+)  | <5.000e-04 (+) | -              | -              |
| 16    | 338258   | p_Bacteroidetes | f_S24-7                  | -              | <5.000e-04 (+) | <5.000e-04 (+) | <5.000e-04 (+) | <5.000e-04 (+) | <5.000e-04 (+) | <5.000e-04 (+) |
| 17    | 322839   | p_Firmicutes    | o_Clostridiales          | -              | <5.000e-04 (+) | <5.000e-04 (+) | <5.000e-04 (+) | <5.000e-04 (+) | <5.000e-04 (+) | <5.000e-04 (+) |
| 18    | 268733   | p_Firmicutes    | f_Clostridiaceae         | -              | -              | -              | -              | -              | -              | -              |
| 19    | OTU30    | p_Firmicutes    | f_Clostridiaceae         | -              | -              | -              | -              | -              | -              | -              |
| 20    | OTU12816 | p_Firmicutes    | f_Clostridiaceae         | -              | -              | -              | -              | -              | -              | 7.004e-03 (-)  |
| 21    | 555945   | p_Firmicutes    | f_Clostridiaceae         | <5.000e-04 (-) | <5.000e-04 (+) | <5.000e-04 (+) | <5.000e-04 (+) | <5.000e-04 (+) | 1.001e-03 (+)  | <5.000e-04 (+) |
| 22    | 425767   | p_Firmicutes    | g_Candidatus Arthromitus | -              | 1.001e-03 (-)  | -              | -              | 2.001e-03 (-)  | 9.005e-03 (-)  | -              |
| 23    | 22668    | p_Firmicutes    | g_Candidatus Arthromitus | 6.003e-03 (-)  | <5.000e-04 (-) | <5.000e-04 (-) | <5.000e-04 (-) | <5.000e-04 (-) | <5.000e-04 (-) | <5.000e-04 (-) |
| 24    | 376862   | p_Firmicutes    | g_Candidatus Arthromitus | -              | <5.000e-04 (-) | 3.002e-03 (-)  | -              | <5.000e-04 (-) | <5.000e-04 (-) | -              |
| 25    | 352559   | p_Firmicutes    | f_Lachnospiraceae        | -              | -              | 6.003e-03 (+)  | <5.000e-04 (+) | -              | -              | <5.000e-04 (+) |
| 26    | 338796   | p_Firmicutes    | f_Ruminococcaceae        | -              | -              | 4.002e-03 (+)  | 9.005e-03 (+)  | -              | <5.000e-04 (+) | -              |
| 27    | 344101   | p_Firmicutes    | f_Ruminococcaceae        | -              | 2.001e-03 (-)  | 4.002e-03 (-)  | 7.004e-03 (-)  | <5.000e-04 (-) | -              | <5.000e-04 (-) |
| 28    | 230759   | p_Firmicutes    | g_Allobaculum            | <5.000e-04 (-) | <5.000e-04 (+) | 1.001e-03 (+)  | 9.005e-03 (+)  | <5.000e-04 (+) | -              | -              |
| 29    | 228310   | p_Tenericutes   | g_Anaeroplasm            | -              | <5.000e-04 (-) | <5.000e-04 (-) | <5.000e-04 (-) | <5.000e-04 (-) | <5.000e-04 (-) | <5.000e-04 (-) |
