# Supplementary material for: Antibiotic perturbation of the murine gut microbiome enhances the adiposity, insulin resistance, and liver disease associated with high-fat diet
Source: PubMed Central journal article supplement (PMC4847194; doi:10.1186/s13073-016-0297-9), 2016-04-27

**A**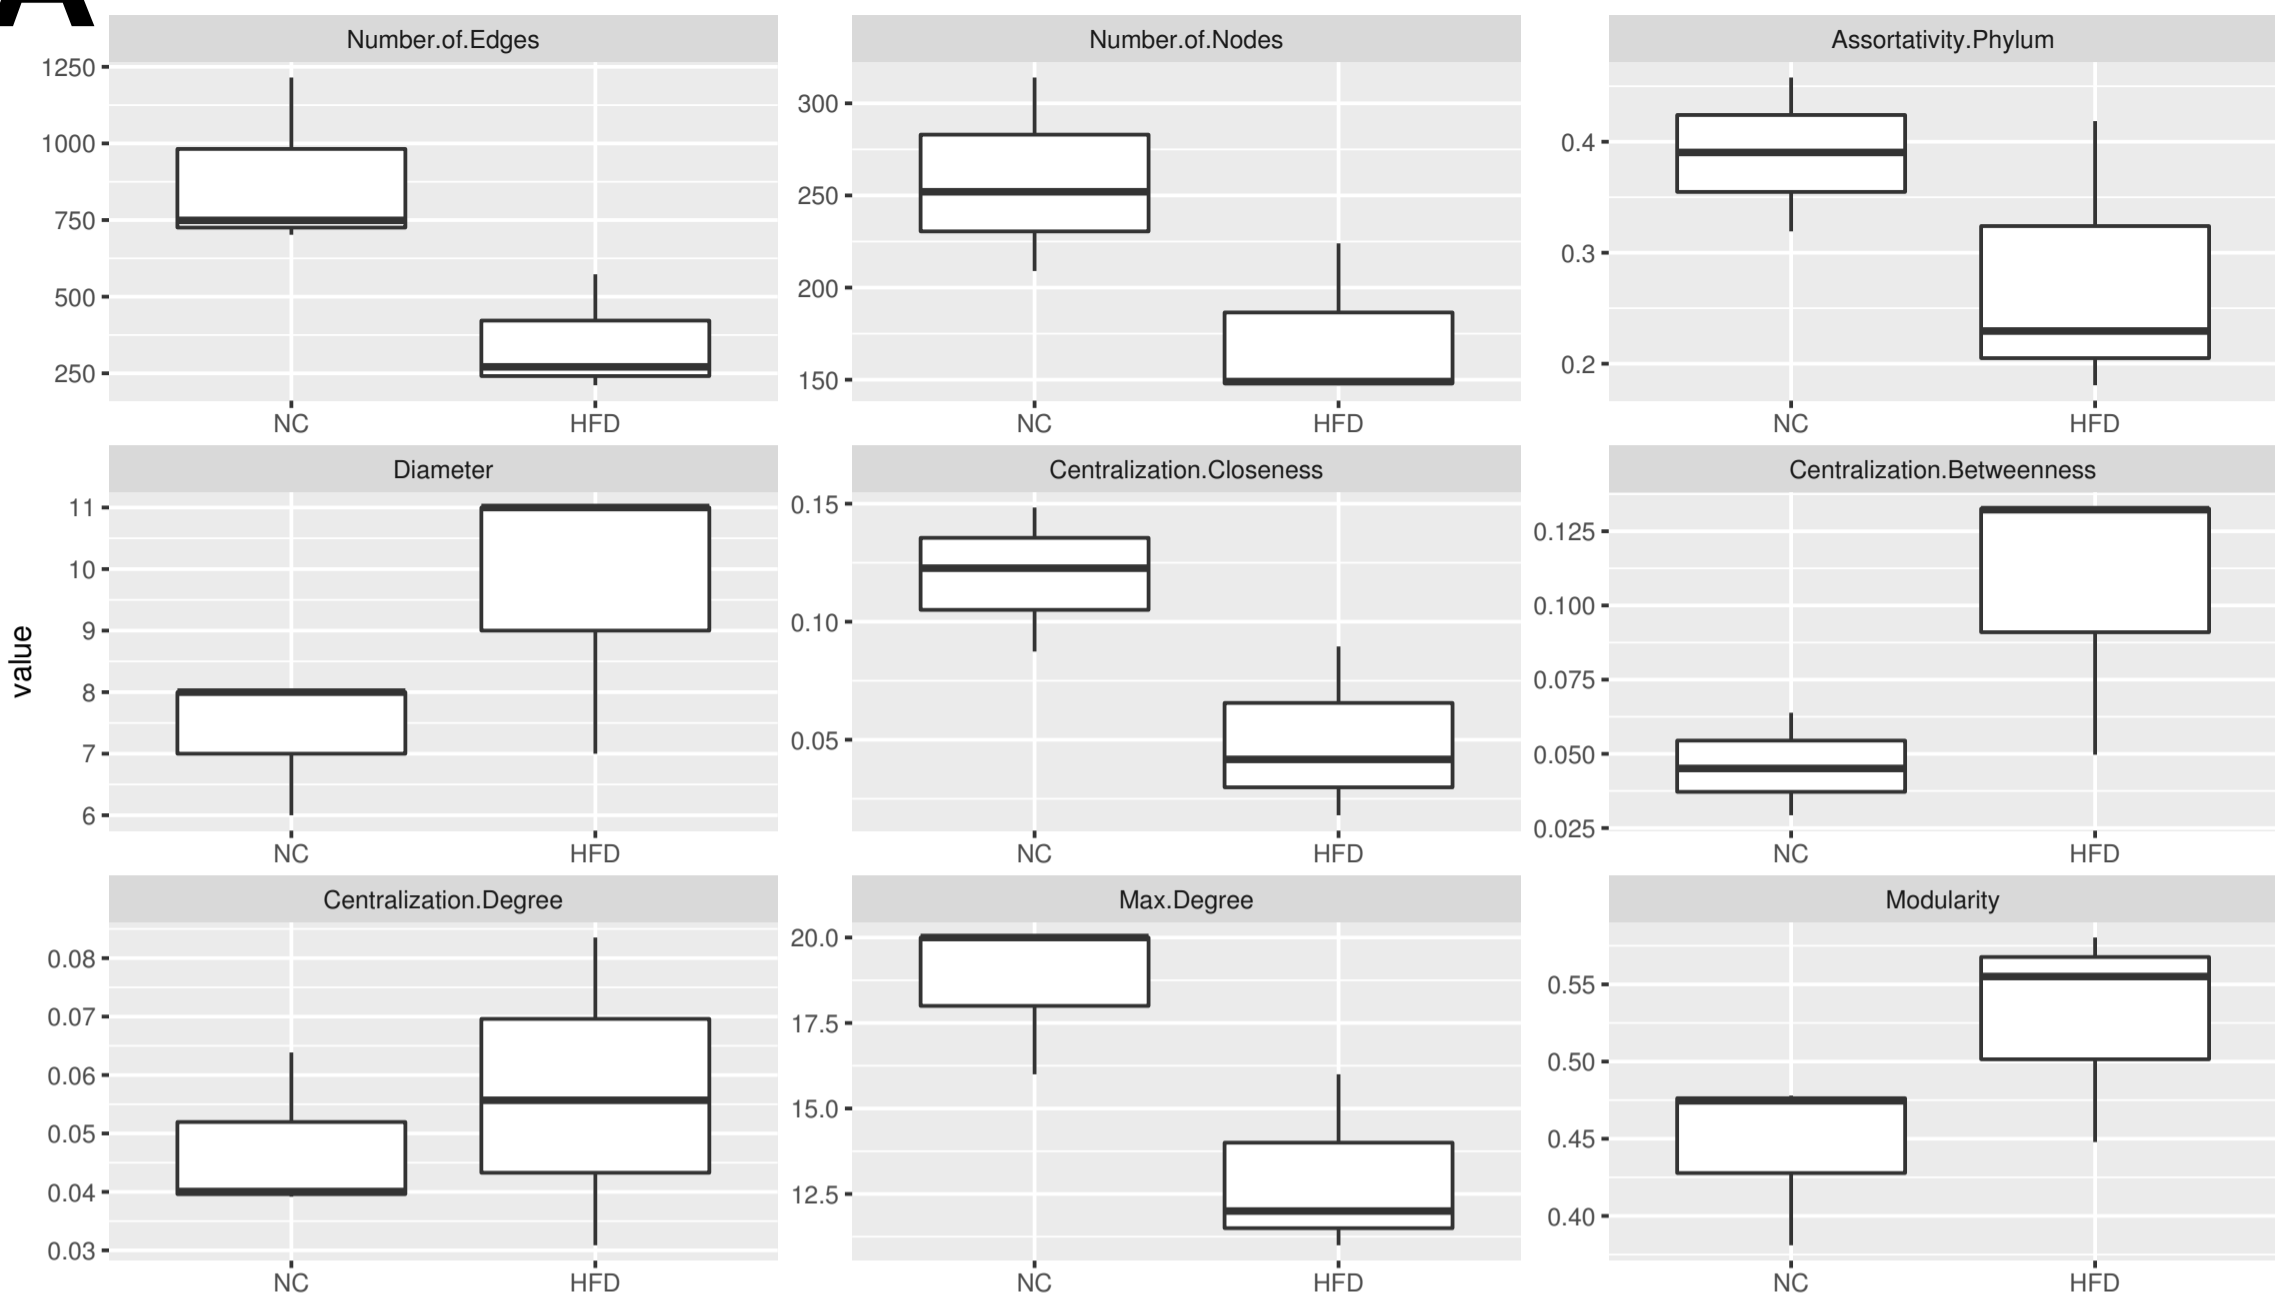**B**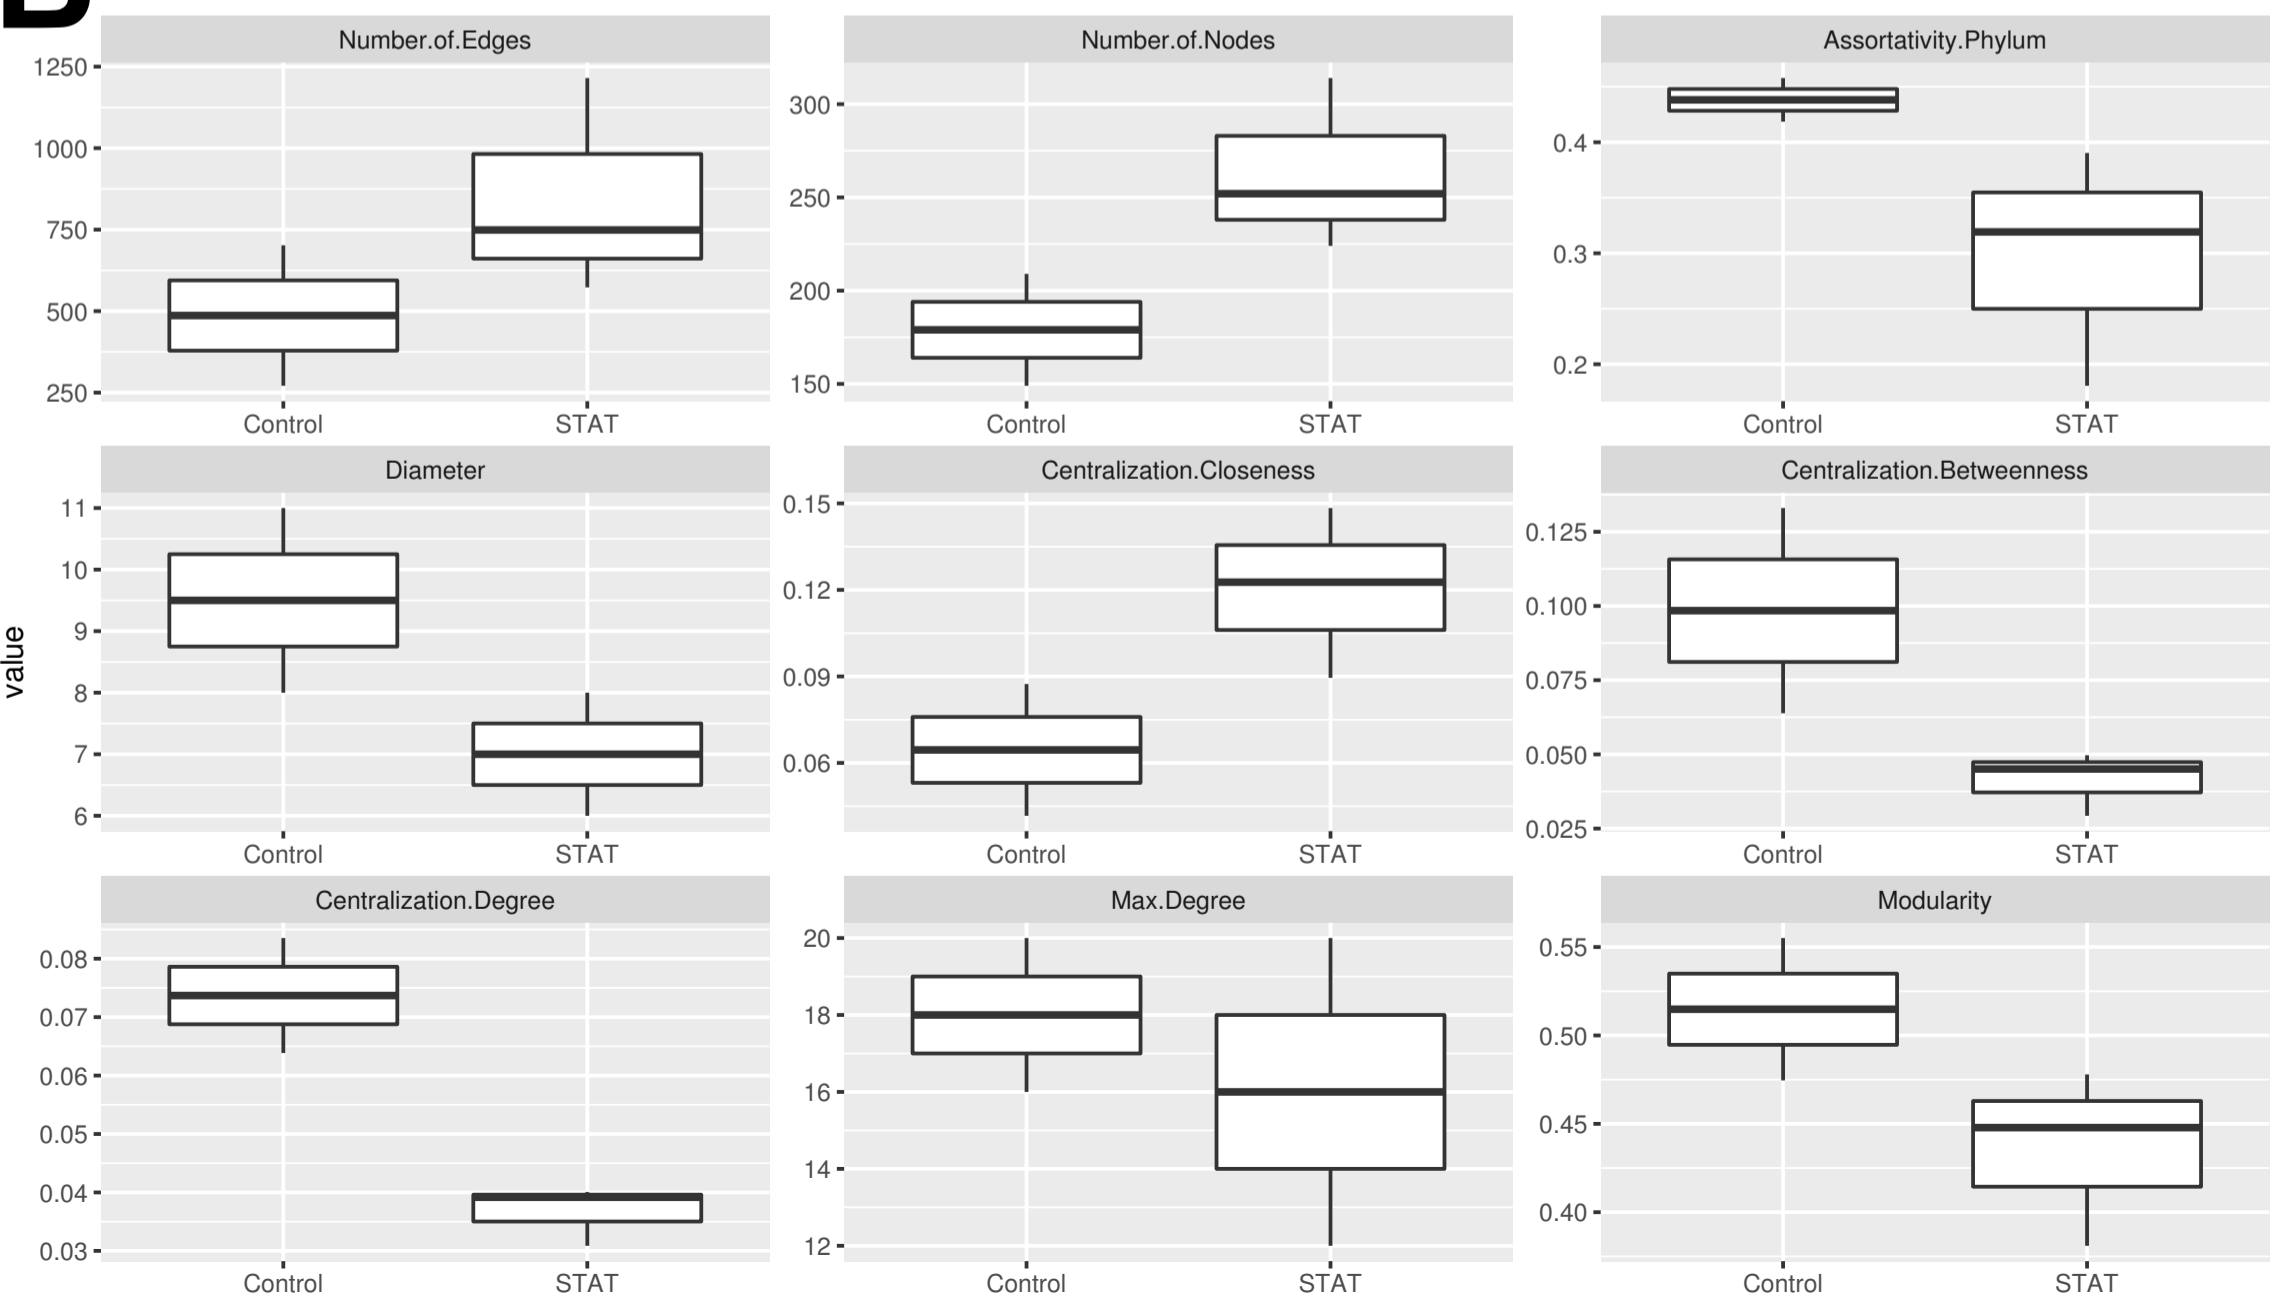

Supplement: 13073_2016_297_MOESM9_ESM.pdf [file 13073_2016_297_MOESM9_ESM.pdf]
